# Supplementary material for: Evaluation of Precipitation Forecast of System: Numerical Tools for Hurricane Forecast
Source: Hindawi journal article supplement (doi:10.1155/2020/8815949), 2020-08-05
Supplement: f1 [file 8815949.f1.pdf]

## 2 **Supplementary Materials: Evaluation of the** 3 **precipitation forecast of the system Numerical Tools** 4 **for Hurricane Forecast**

5 **José Carlos Fernández-Alvarez** <sup>1\*</sup>, **Albenis Pérez-Alarcón**, <sup>2</sup> **Alfo José Batista-Leyva** <sup>3</sup> and  
6 **Oscar Díaz-Rodríguez** <sup>4</sup>

7 <sup>1</sup> Departamento de Meteorología, Instituto Superior de Tecnologías y Ciencias Aplicadas, Universidad de  
8 la Habana, La Habana/10400, Cuba.

9 <sup>2</sup> Departamento de Meteorología, Instituto Superior de Tecnologías y Ciencias Aplicadas, Universidad de  
10 la Habana, La Habana/10400, Cuba.

11 <sup>3</sup> Departamento de Física Atómica y Molecular, Instituto Superior de Tecnologías y Ciencias Aplicadas,  
12 Universidad de la Habana, La Habana/10400, Cuba.

13 <sup>4</sup> Centro de Física de la Atmósfera, Instituto Cubano de Meteorología, La Habana/10400, Cuba.

14 \* Correspondence should be addressed to José C. F. Alvarez; jcfernandez@instec.cu

15

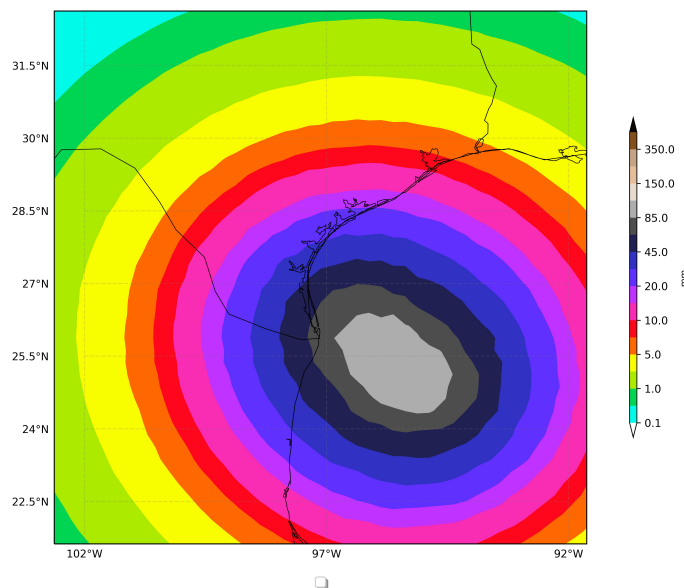

**Figure 1.** Precipitation distribution predicted by R-CLIPER for hurricane Harvey at 2400 UTC, August 25th, 2017.

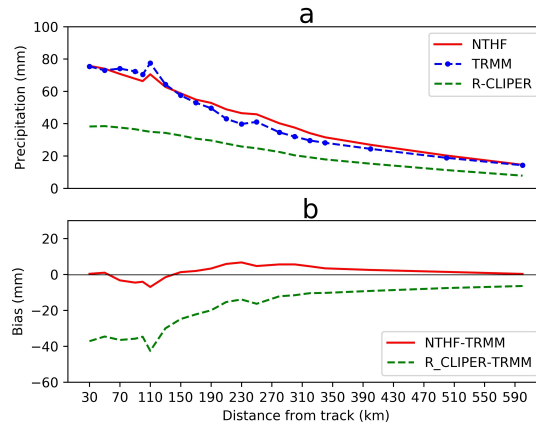

**Figure 2.** Mean rainfall radial distribution for 48 hours. a) The values determined from TRMM, and calculated by the systems NTHF and R-CLIPER. b) The bias between the system's predictions and the measurements of TRMM.

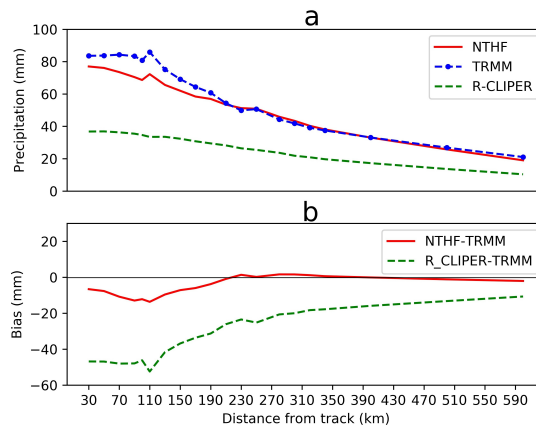

**Figure 3.** Mean rainfall radial distribution for 72 hours. a) The values determined from TRMM, and calculated by the systems NTHF and R-CLIPER. b) The bias between the system's predictions and the measurements of TRMM.

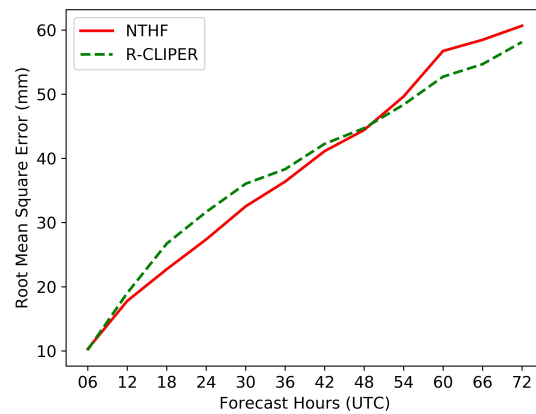

**Figure 4.** Root mean square error. The time dependence of RMSE for both systems.

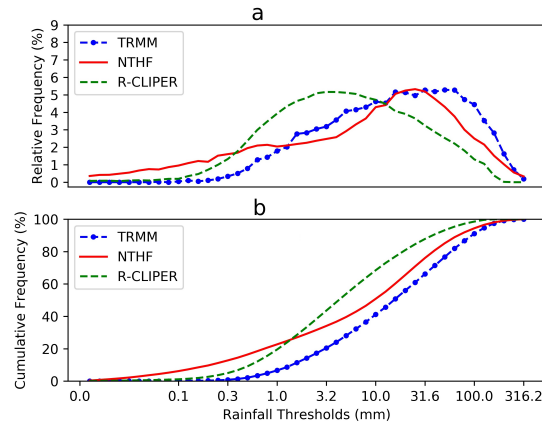

**Figure 5.** Frequency distribution of rain flux for 48 hours. a) The probability distribution function of the observed (blue line) frequency of rainfall above a given threshold, as well as NTHF (red line) and R-CLIPER (green line). b) Cumulative distribution function of the observed and predicted data, calculated from data of frequency distribution.

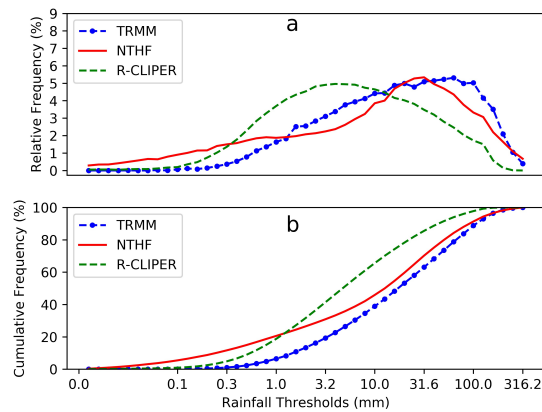

**Figure 6.** Frequency distribution of rain flux for 72 hours. a) The probability distribution function of the observed (blue line) frequency of rainfall above a given threshold, as well as NTHF (red line) and R-CLIPER (green line). b) Cumulative distribution function of the observed and predicted data, calculated from data of frequency distribution.

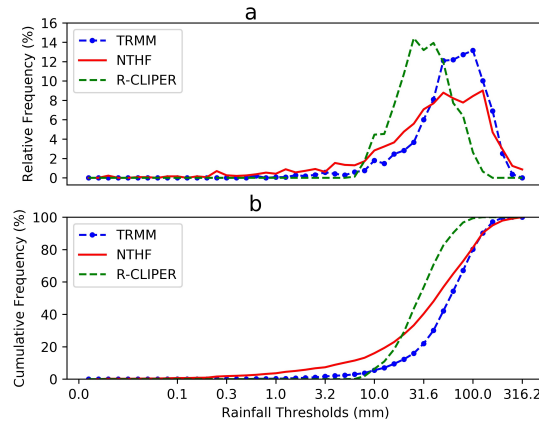

**Figure 7.** Frequency distribution of rain flux for 24 hours in the band 0 – 100 km a) The probability distribution function of the observed (blue line) frequency of rainfall above a given threshold, as well as NTHF (red line) and R-CLIPER (green line). b) Cumulative distribution function of the observed and predicted data, calculated from data of frequency distribution.

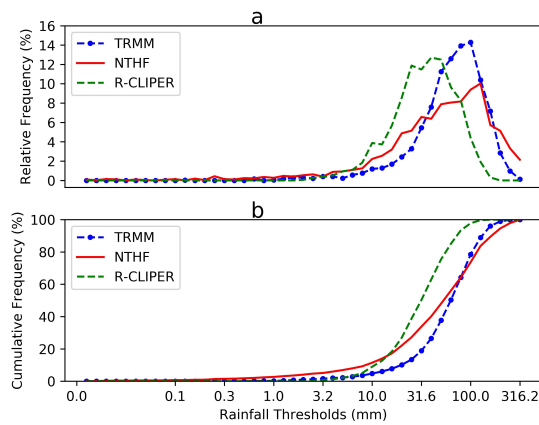

**Figure 8.** Frequency distribution of rain flux for 48 hours in the band 0 – 100 km a) The probability distribution function of the observed (blue line) frequency of rainfall above a given threshold, as well as NTHF (red line) and R-CLIPER (green line). b) Cumulative distribution function of the observed and predicted data, calculated from data of frequency distribution.



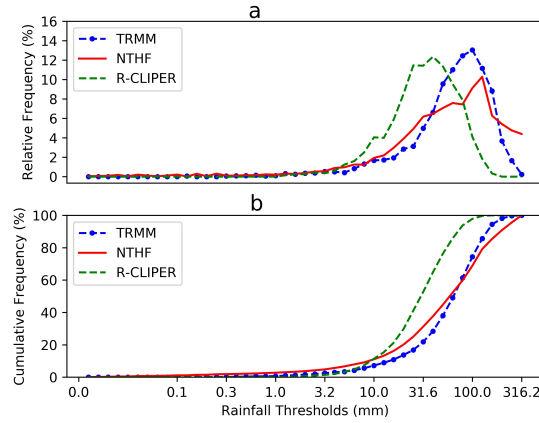

**Figure 9.** Frequency distribution of rain flux for 72 hours in the band 0 – 100 km a) The probability distribution function of the observed (blue line) frequency of rainfall above a given threshold, as well as NTHF (red line) and R-CLIPER (green line). b) Cumulative distribution function of the observed and predicted data, calculated from data of frequency distribution.

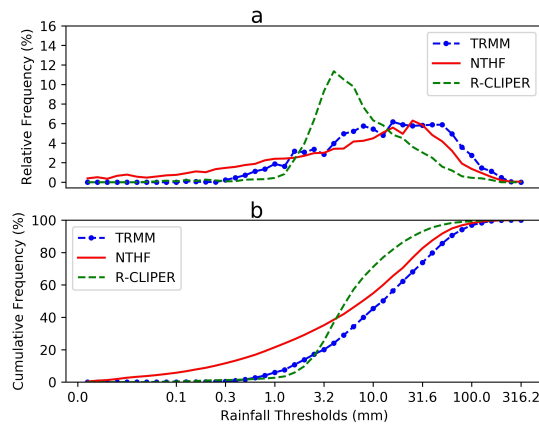

**Figure 10.** Frequency distribution of rain flux for 24 hours in the band 300 – 400 km a) The probability distribution function of the observed (blue line) frequency of rainfall above a given threshold, as well as NTHF (red line) and R-CLIPER (green line). b) Cumulative distribution function of the observed and predicted data, calculated from data of frequency distribution.

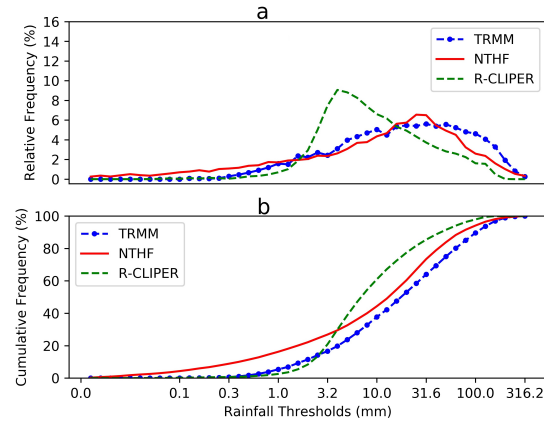

**Figure 11.** Frequency distribution of rain flux for 48 hours in the band 300 – 400 km a) The probability distribution function of the observed (blue line) frequency of rainfall above a given threshold, as well as NTHF (red line) and R-CLIPER (green line). b) Cumulative distribution function of the observed and predicted data, calculated from data of frequency distribution.

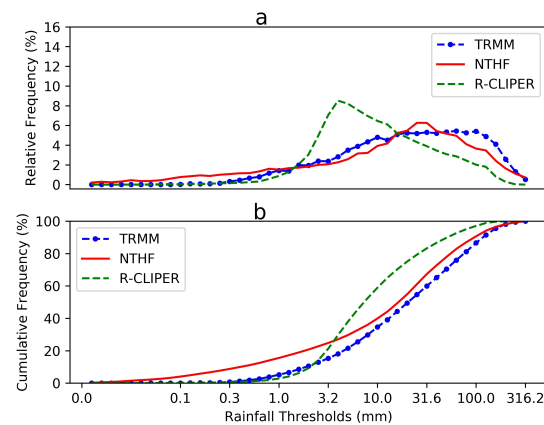

**Figure 12.** Frequency distribution of rain flux for 72 hours in the band 300 – 400 km a) The probability distribution function of the observed (blue line) frequency of rainfall above a given threshold, as well as NTHF (red line) and R-CLIPER (green line). b) Cumulative distribution function of the observed and predicted data, calculated from data of frequency distribution.
